# Supplementary material
Source: PubMed Central journal article supplement (PMC1868804)
Supplement: bj4040207add.pdf [file bj4040207add.pdf]

## **Identification and localization of soluble sulfotransferases in the human gastrointestinal tract**

Wera TEUBNER, Walter MEINL, Simone FLORIAN, Michael KRETZSCHMAR and Hansruedi GLATT

**Supplementary Data**

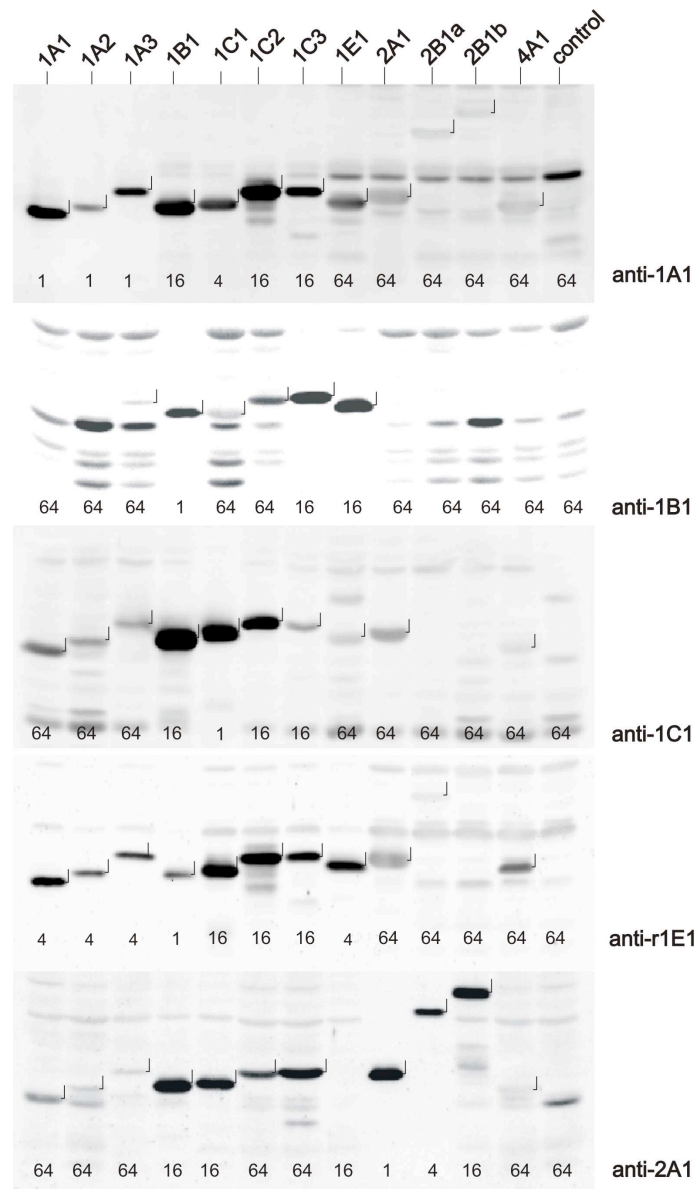

**Figure 1 Immunodetection of human SULT forms, individually expressed in *S. typhimurium* TA1538, using various antisera**

Bacterial cytosolic preparations were electrophoresed, transferred to nitrocellulose membranes, and then probed with the indicated native antisera (without any immunoabsorption to enhance specificity). Based on the results of initial dose-finding experiments (not shown), 1, 4, 16 or 64  $\mu\text{g}$  of protein of the SULT-expressing strains was used. An amount of 64  $\mu\text{g}$  was always employed for the untransformed strain (“control”). Dashes indicate the position of the corresponding SULT protein.

**Table 1 Electrophoretic mobility and immunodetection of human SULT forms**

Various amounts of cytosolic fractions of *S. typhimurium* strains expressing the indicated human SULT form were electrophoresed, blotted and probed with the indicated antisera (AS). The electrophoretic mobility is expressed as apparent molecular mass ( $M_{app}$ ). Representative blots are shown in Figure 6. In order to produce a strong signal, 1  $\mu$ g [+++], 2 – 4  $\mu$ g [++] or 8 – 16  $\mu$ g [+] bacterial protein was required. In the other cases, immunoreactivity was weak [(+)] or undetectable [-].

| SULT form | $M_{app}$ , kDa | Immunoreactivity |             |             |              |             |
|-----------|-----------------|------------------|-------------|-------------|--------------|-------------|
|           |                 | Anti-1A1-AS      | Anti-1B1-AS | Anti-1C1-AS | Anti-r1E1-AS | Anti-2A1-AS |
| 1A1       | 32              | +++              | -           | (+)         | ++           | (+)         |
| 1A2       | 32.5            | ++               | -           | (+)         | ++           | (+)         |
| 1A3       | 34              | +++              | -           | (+)         | ++           | -           |
| 1B1       | 32.5            | +*               | +++         | +*          | ++           | +           |
| 1C1       | 33              | ++               | (+)         | +++         | +            | +           |
| 1C2       | 34              | +                | (+)         | +           | +            | (+)         |
| 1C3       | 34              | +                | +           | (+)         | +            | (+)         |
| 1E1       | 33.5            | (+)              | +           | (+)         | ++           | (+)         |
| 2A1       | 34              | (+)              | (+)         | (+)         | (+)          | +++         |
| 2B1a      | 40              | -                | -           | -           | -            | ++          |
| 2B1b      | 42              | -                | -           | -           | -            | +           |
| 4A1       | 32              | -                | -           | -           | (+)          | -           |

\* Cross-reactivity of anti-1A1- and anti-1C1-antisera with SULT1B1 was abolished by pre-incubating with SULT1B1-sepharose.

**Table 2 Influence of the codon 213 Arg/His genotype on the level of SULT1A1 protein in colon and rectum mucosa**

Values refer to the same SULT1A1 protein determinations as summarized in Table 4. One rectal sample could not be genotyped as it had been used up.

| Tissue | Genotype | n  | ng SULT1A1 / mg cytosolic protein |           |
|--------|----------|----|-----------------------------------|-----------|
|        |          |    | Mean                              | Range     |
| Colon  | Arg/Arg  | 14 | 171                               | 58 – 270  |
|        | His/His  | 5  | 151                               | 125 – 250 |
|        | His/Arg  | 9  | 208                               | 44 – 480  |
| Rectum | Arg/Arg  | 5  | 173                               | 85 – 220  |
|        | His/His  | 1  | 100                               | -         |
|        | His/Arg  | 4  | 243                               | 90 – 320  |

**Table 3 Levels of SULT proteins in cytosolic fractions of human gastrointestinal mucosa and liver**

SULT levels were determined semi-quantitatively using inclusion bodies and cytosolic fractions from recombinant bacteria as standards. This method may involve inaccuracies in the absolute value (we estimate by a factor of up to 3), but should be more accurate for comparison of the same protein in different samples (within rows). Values are means and, in parentheses, ranges of n samples (indicated in the column heading). -, below the limit of detection (75 ng/mg for SULT1A2 and 1A3, 3 ng/mg for SULT1C1, 10 ng/mg for SULT2A1, and 6 ng/mg for SULT1E1).

| SULT form * | ng SULT / mg cytosolic protein |                    |                  |                    |                       |                    |                  |
|-------------|--------------------------------|--------------------|------------------|--------------------|-----------------------|--------------------|------------------|
|             | Rectum<br>(n = 11)             | Colon<br>(n = 28)  | Cecum<br>(n = 1) | Jejunum<br>(n = 1) | Ileum<br>(n = 4)      | Stomach<br>(n = 1) | Liver<br>(n = 1) |
| 1A1         | 210<br>(85 – 320)              | 180<br>(44 – 480)  | 150              | 75                 | 1200<br>(990 – 1600)  | 75                 | 800 #            |
| 1A2         | -                              | - †                | 75               | -                  | - †                   | -                  | 75 #             |
| 1A3         | 310<br>(130 – 480)             | 320<br>(100 – 880) | 300              | 300                | 1500<br>(1200 – 1700) | 150                | - #              |
| 1B1         | 130<br>(50 – 230)              | 120<br>(28 – 270)  | 100              | 50                 | 420<br>(110 – 530)    | 50                 | 25 #             |
| 1C1         | -                              | - †                | -                | -                  | - ‡                   | 25                 | -                |
| 1E1         | -                              | -                  | 6                | 12                 | 50<br>(25 – 100)      | -                  | 100              |
| 2A1         | -                              | -                  | 25               | 200                | 150<br>(50 – 300)     | -                  | 1000             |

\* The remaining forms were not detected in the gastrointestinal tract and liver, but the limit of detection was relatively high (100 ng/mg for SULT2B1a and  $\geq$  400 ng/mg for SULT1C2, 1C3, 2B1b and 4A1).

† Two samples showed immunoreactivity at the limit of detection.

‡ One sample showed immunoreactivity at the limit of detection.

# Using a similar protocol we recently analyzed three other liver samples for expression of these SULT proteins. Levels (ng / mg cytosolic protein) amounted to 700-2500 for SULT1A1, 100-300 for SULT1A2, 0 for SULT1A3 and 100-500 for SULT1B1 [19].

**Table 4** SULT activities towards estradiol (20 nM), characteristic for SULT1E1, and DHEA (3  $\mu$ M), characteristic for SULT2A1, in cytosolic preparations from human tissues

Gastrointestinal samples were prepared from the mucosa. Colon pool was generated by mixing equal amounts of protein from 8 samples of colon mucosa homozygous for SULT1A1\*213Arg. SULT pool was generated by mixing soluble fractions of *E. coli* BL21-SULT1A1\*213Arg, -1B1 and -1A3 with cytosolic protein of SULT-deficient Chinese hamster V79 cells so that its SULT levels and patterns (determined by immunoblotting) reflected the colon pool. Values are means  $\pm$  SE of two enzyme activity measurements.

| Sample                       | SULT activity, pmol $\cdot$ mg <sup>-1</sup> $\cdot$ min <sup>-1</sup> |               |
|------------------------------|------------------------------------------------------------------------|---------------|
|                              | Estradiol                                                              | DHEA          |
| SULT pool (1A1, 1A3 and 1B1) | 0.11 $\pm$ 0.04                                                        | not detected* |
| Rectum <sup>†</sup>          | 0.07 $\pm$ 0.01                                                        | not detected* |
| Colon pool                   | 0.04 $\pm$ 0.01                                                        | not detected* |
| Cecum <sup>†</sup>           | 0.6 $\pm$ 0.1                                                          | 10 $\pm$ 4    |
| Ileum                        |                                                                        |               |
| Sample 1                     | 3.3 $\pm$ 0.4                                                          | 59 $\pm$ 9    |
| Sample 2                     | 2.3 $\pm$ 0.2                                                          | 22 $\pm$ 4    |
| Sample 3                     | 3.8 $\pm$ 0.8                                                          | 121 $\pm$ 17  |
| Sample 4                     | 8.6 $\pm$ 0.7                                                          | 35 $\pm$ 2    |
| Jejunum <sup>†</sup>         | 2.0 $\pm$ 0.2                                                          | 81 $\pm$ 13   |
| Stomach <sup>†</sup>         | 0.13 $\pm$ 0.03                                                        | not detected* |
| Liver <sup>†</sup>           | 8.7 $\pm$ 0.1                                                          | 372 $\pm$ 9   |

\* Limit of detection was 5 pmol  $\cdot$  mg<sup>-1</sup>  $\cdot$  min<sup>-1</sup>.

<sup>†</sup> A single sample was analyzed for this tissue.
